# Supplementary material
Source: MDPI journal article supplement (https://www.mdpi.com/2410-3896/3/4/31)
Supplement: s1 [file s1]

## Supplementary Material

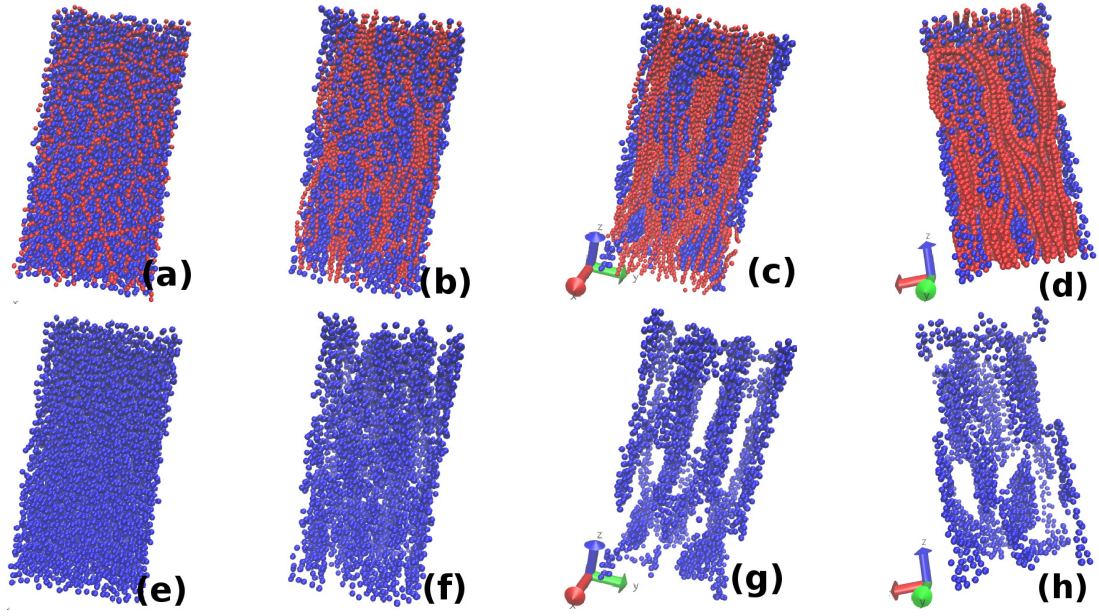

FIG. 1. The figure shows snapshots for four different values of  $\sigma_{4n}$  from (a)-(d) or (e)-(h),  $1.25\sigma, 1.75\sigma, 2.25\sigma$  and  $2.5\sigma$ , respectively, for  $\epsilon_n = 0$ . The upper row shows both the nanoparticles and monomers, while, the lower row shows only nanoparticles. The micellar chains are in dispersed state for  $\sigma_{4n} = 1.25\sigma$ . For  $\sigma_{4n} > 1.25\sigma$ , the nanoparticles and micellar chains form network-like structures (in (b,c) or (f,g)) which show a morphological transition for  $\sigma_{4n} = 2.5\sigma$  forming individual sheets of nanoparticles (in (h)).

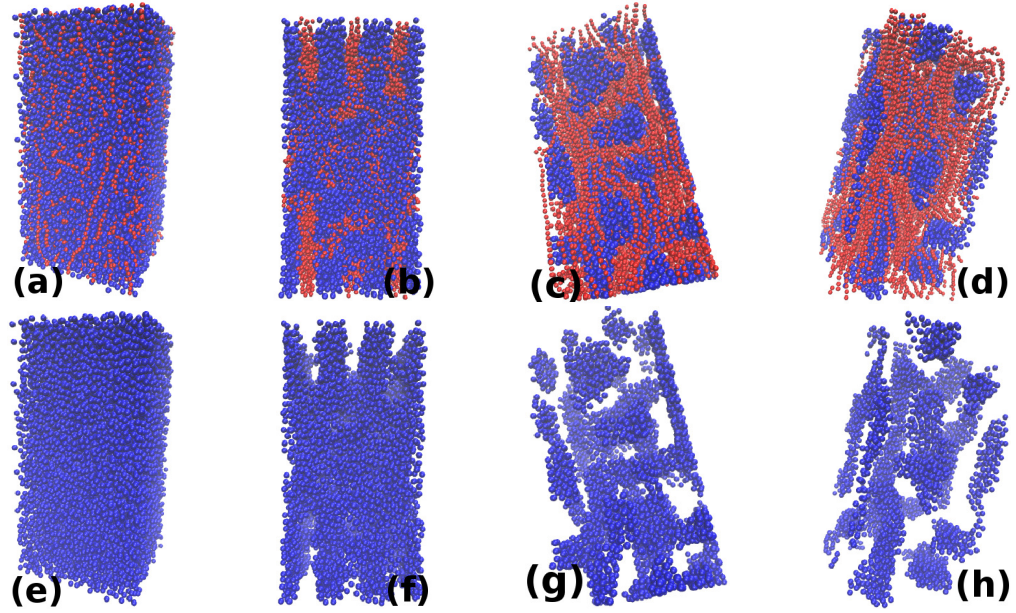

FIG. 2. The figure shows snapshots for four different values of  $\sigma_{4n}$  from left to right,  $1.25\sigma, 1.75\sigma, 2.5\sigma$  and  $2.75\sigma$ , respectively, for  $\epsilon_n = 5k_B T$ . The upper row shows both the nanoparticles and monomers, while the lower row shows only nanoparticles. With an increase in  $\sigma_{4n}$  from  $1.25\sigma$  to  $1.5\sigma$ , the micellar chains show a morphological transition from a dispersed state to the formation of clusters of micellar chains that joins to form a network-like structure. With further increase in  $\sigma_{4n}$ , the system form some intermediate structures with nanoparticle network breaking gradually and finally showing a transition for  $\sigma_{4n} = 2.75\sigma$  forming individual sheets of nanoparticles.

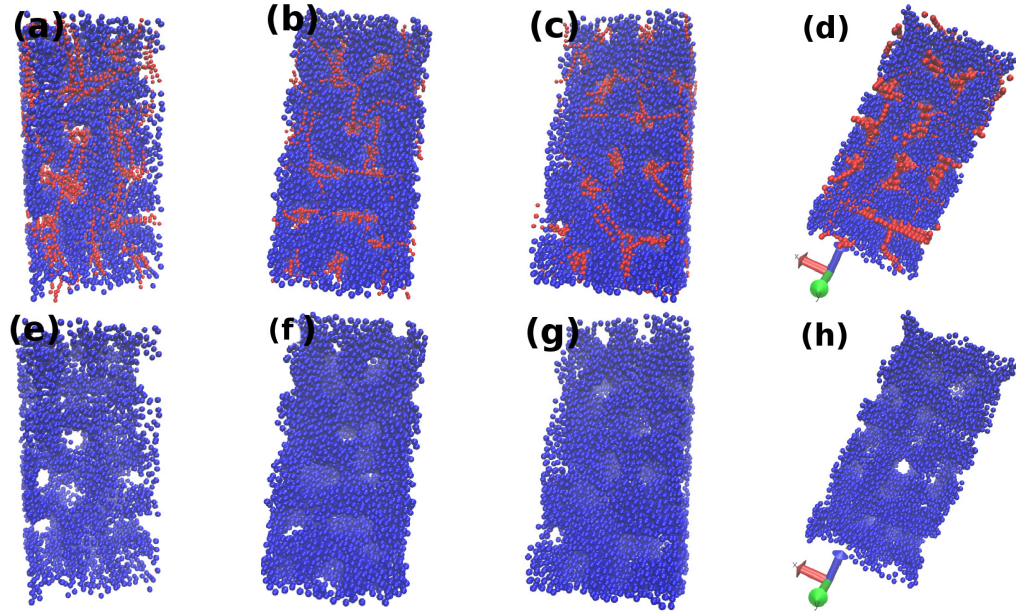

FIG. 3. The figure shows the snapshots for monomer no. density  $\rho_m = 0.037\sigma^{-3}$  and  $\sigma_{4n} = 2.75\sigma$  for four different values of  $\epsilon_n = 0, 2, 5$  and  $11(k_B T)$  from left to right respectively. The upper row shows both the nanoparticles(blue) and monomers(red) while, the lower row shows only nanoparticles. All the snapshots for  $\epsilon_n > 0$  show similar kind of nanoparticle arrangement but the nanoparticle show lower packing for  $\epsilon_n = 0$ .
